# Supplementary material for: Development and Feasibility of a Digital Acceptance and Commitment Therapy–Based Intervention for Generalized Anxiety Disorder: Pilot Acceptability Study
Source: PubMed Central journal article supplement (PMC7902195; doi:10.2196/21737), 2021-02-09
Supplement: formative_v5i2e21737_app1.pdf [file formative_v5i2e21737_app1.pdf]

## Mood tracker

### BioBase Screenshots - EMA: 'mood tracker'

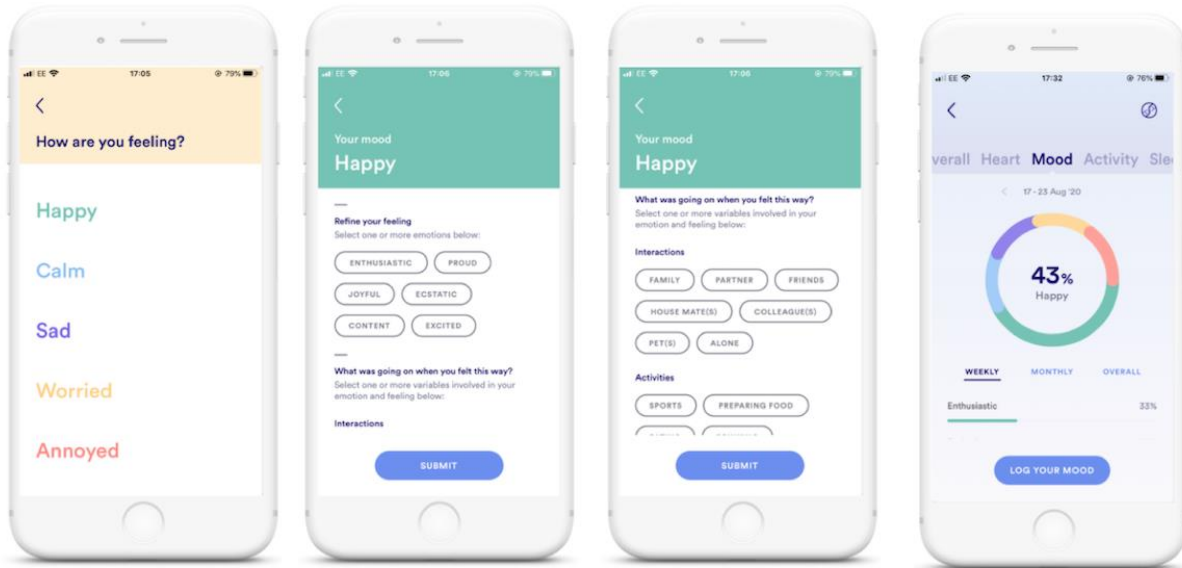

## Tools and dashboards

### BioBase Screenshots: Tools and dashboards

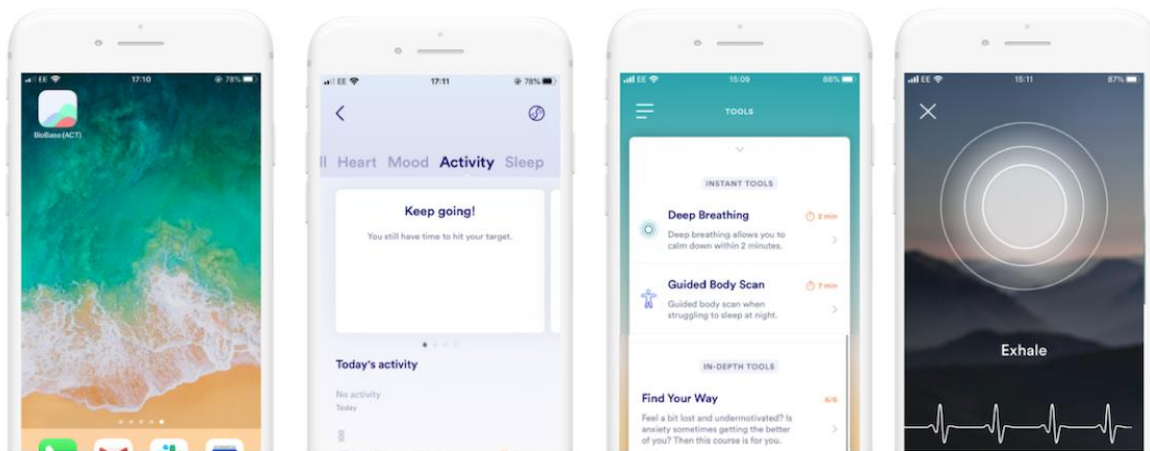

APP ICON

ACTIVITY DASHBOARD

TOOL DASHBOARD

BREATHING TOOL

## Modules

## BioBase Screenshots: Modules

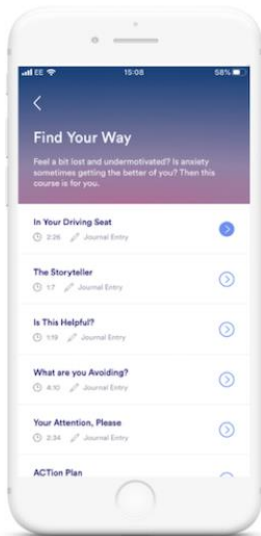

MODULE OPTIONS

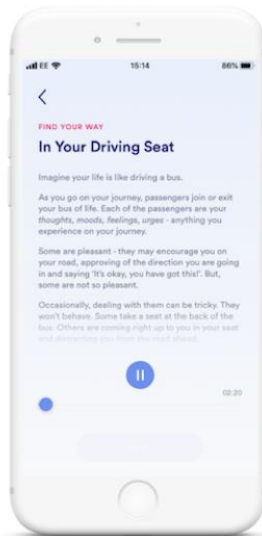

AUDIO OR TEXT

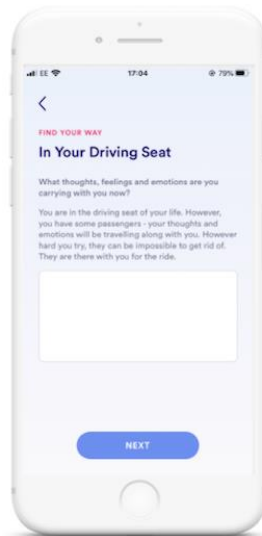

ACTIVITY WITH FREE TEXT

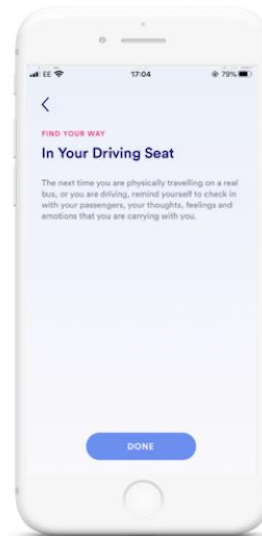

MODULE REVIEW
